# Supplementary material
Source: PubMed Central journal article supplement (PMC3433869)

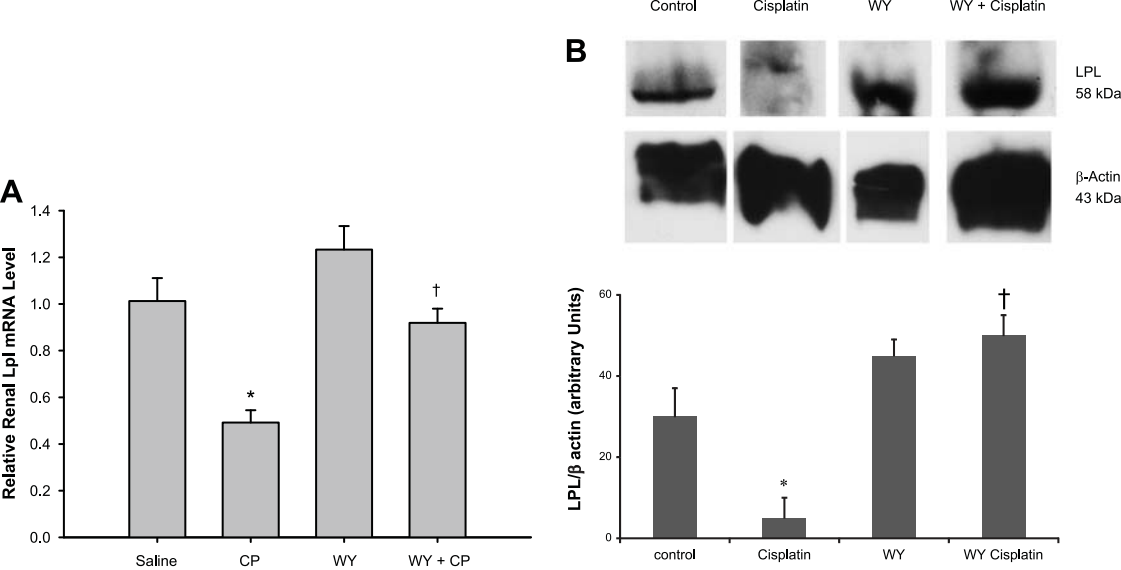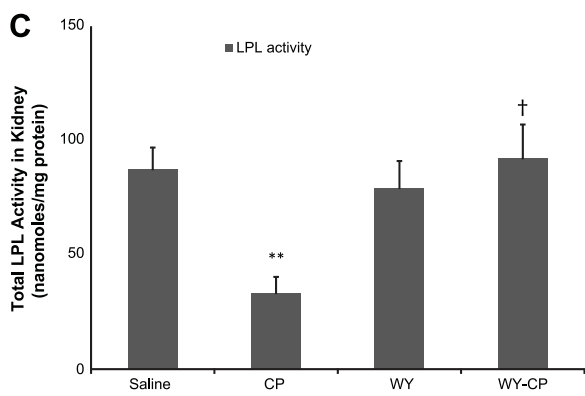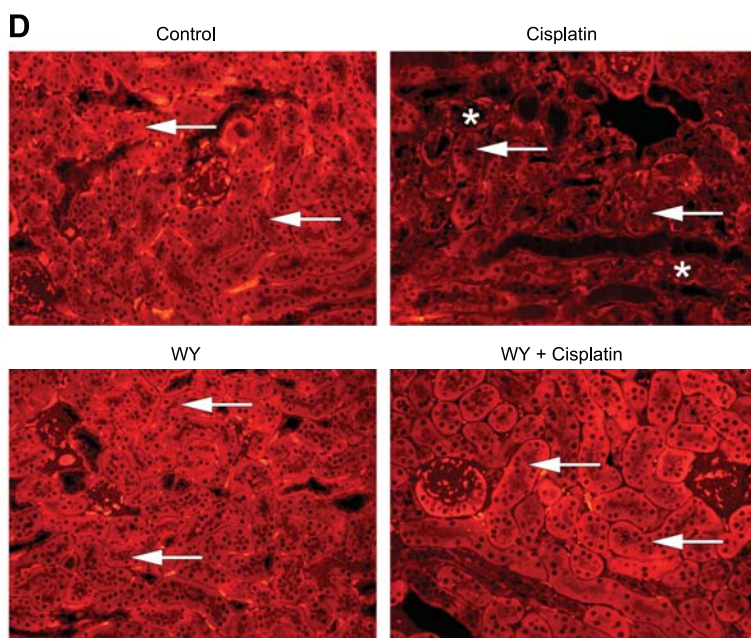

Supplement: supp_00111.2012_Revised_Figure_4.pdf [file supp_00111.2012_Revised_Figure_4.pdf]
